# Supplementary material for: Repetitive mild TBI causes pTau aggregation in nigra without altering preexisting fibril induced Parkinson’s-like pathology burden
Source: Springer Nature journal article supplement (doi:10.1186/s40478-022-01475-9), 2022-11-26
Supplement: MOESM1 [file 40478_2022_1475_MOESM1_ESM.pdf]

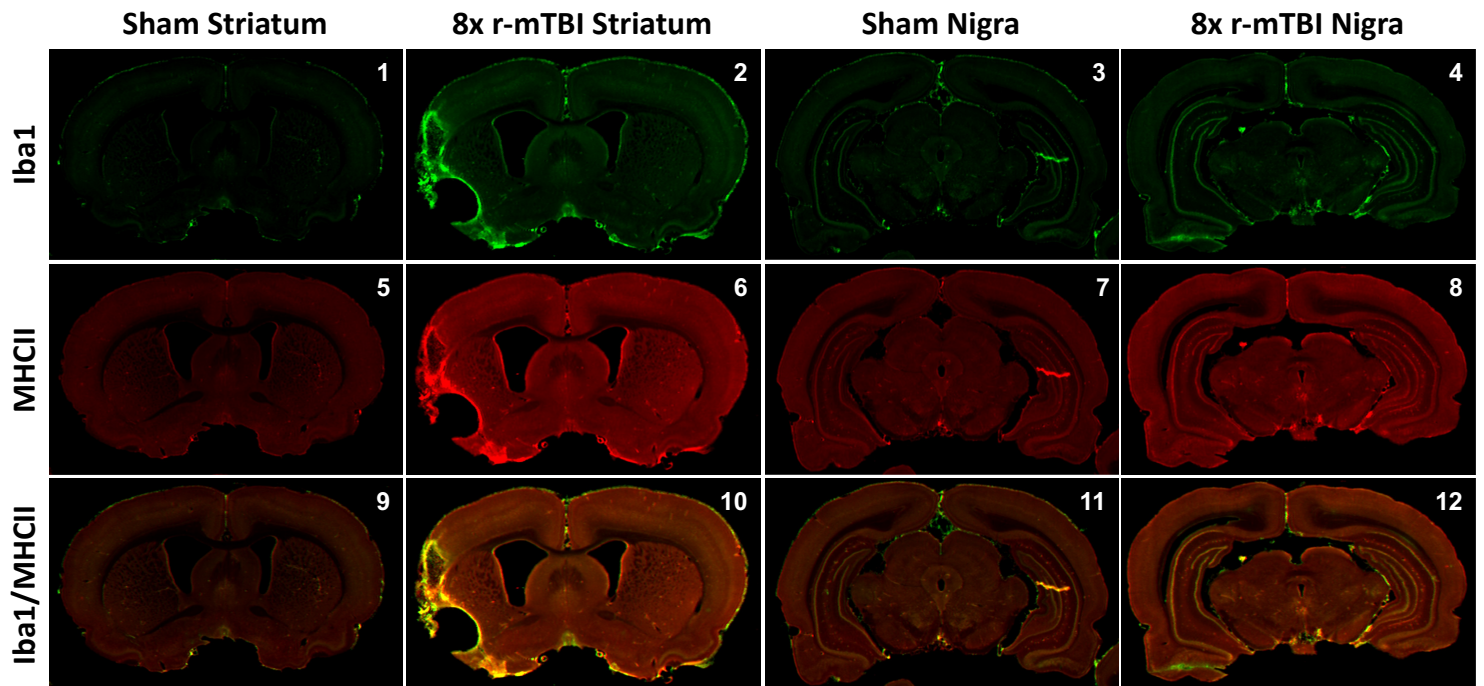

**Figure 1S.** 8x r-mTBI and age matched sham control brain sections stained for microglia iba1+ (green) and MHCII (red) and scanned using Li-COR odyssey. Sham striatum 1,5,9 and sham nigra 3,7,11 containing coronal sections show low iba+ and MHCII signal. 8x r-mTBI striatum 2,6,10 and 8x r-mTBI nigra 4,8,12 show microglial infiltration of injured brain areas with colocalization of iba1 and MHCII signal.
